# Supplementary material
Source: Springer Nature journal article supplement (https://www.springermedizin.de/resource/supplementary/12889_2010_3559_MOESM5_ESM.pdf/9489340)

Mean Cartridges/day

5  
4  
3  
2  
1  
0

Week 4

Week 8

Week 12

Week 24

Time

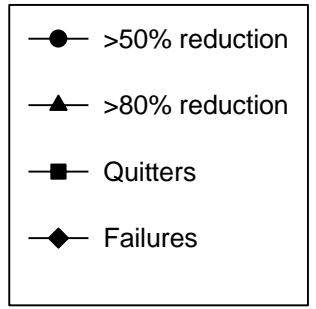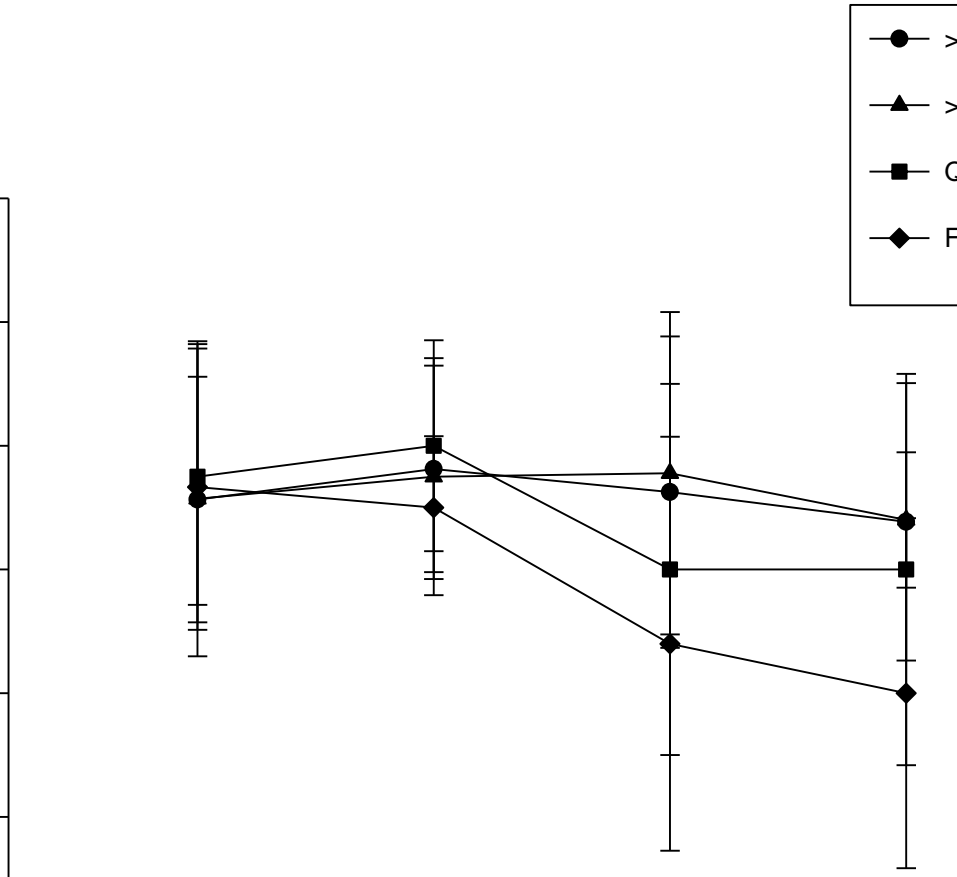

Supplement: MOESM5 [file 9489340]
